# Supplementary material for: Mechanistic study of DETA-modified CdS for carbon dioxide reduction
Source: Royal Society of Chemistry journal article supplement (doi:10.1039/d4cy01140f), 2024-01-01
Supplement: d4cy01140f1.pdf [file d4cy01140f1.pdf]

# Supporting Information

## Mechanistic Study of DETA-Modified CdS for Carbon Dioxide Reduction

Meiyan Guo,<sup>‡a</sup> Wanxiang Yang,<sup>‡a</sup> Yi Li,<sup>ab</sup> Yongfan Zhang,<sup>\*ab</sup> Wei Lin<sup>\*ab</sup>

<sup>a</sup> State Key Laboratory of Photocatalysis on Energy and Environment, College of Chemistry, Fuzhou University, Fuzhou 350108, P.R. China

<sup>b</sup> Fujian Provincial Key Laboratory of Theoretical and Computational Chemistry, Xiamen University, Xiamen, Fujian 361005, China

<sup>‡</sup> Co-first author.

E-mail: zhangyf@fzu.edu.cn (Y. Zhang); wlin@fzu.edu.cn (W. Lin)

The adsorption energy ( $E_{\text{ads}}$ ) was defined as:

$$E_{\text{ads}} = E_{\text{A-S}} - E_{\text{S}} - E_{\text{A}} \quad (1)$$

where  $E_{\text{A}}$ ,  $E_{\text{S}}$  and  $E_{\text{A-S}}$  refer to the energies of isolated product (A), slab (S) with clean surface, and the adsorbed system after corrected by the solvation effect, respectively.<sup>1</sup>

The change of Gibbs free energy ( $\Delta G$ ) was computed as follows:

$$\Delta G = \Delta E + \Delta E_{\text{ZPE}} - T\Delta S \quad (2)$$

where  $\Delta E$  is the electronic energy change from the total energy, and  $\Delta E_{\text{ZPE}}$  and  $\Delta S$  are the difference between the zero-point energy and entropy, respectively.  $T$  is the room temperature (298.15 K).<sup>2</sup>

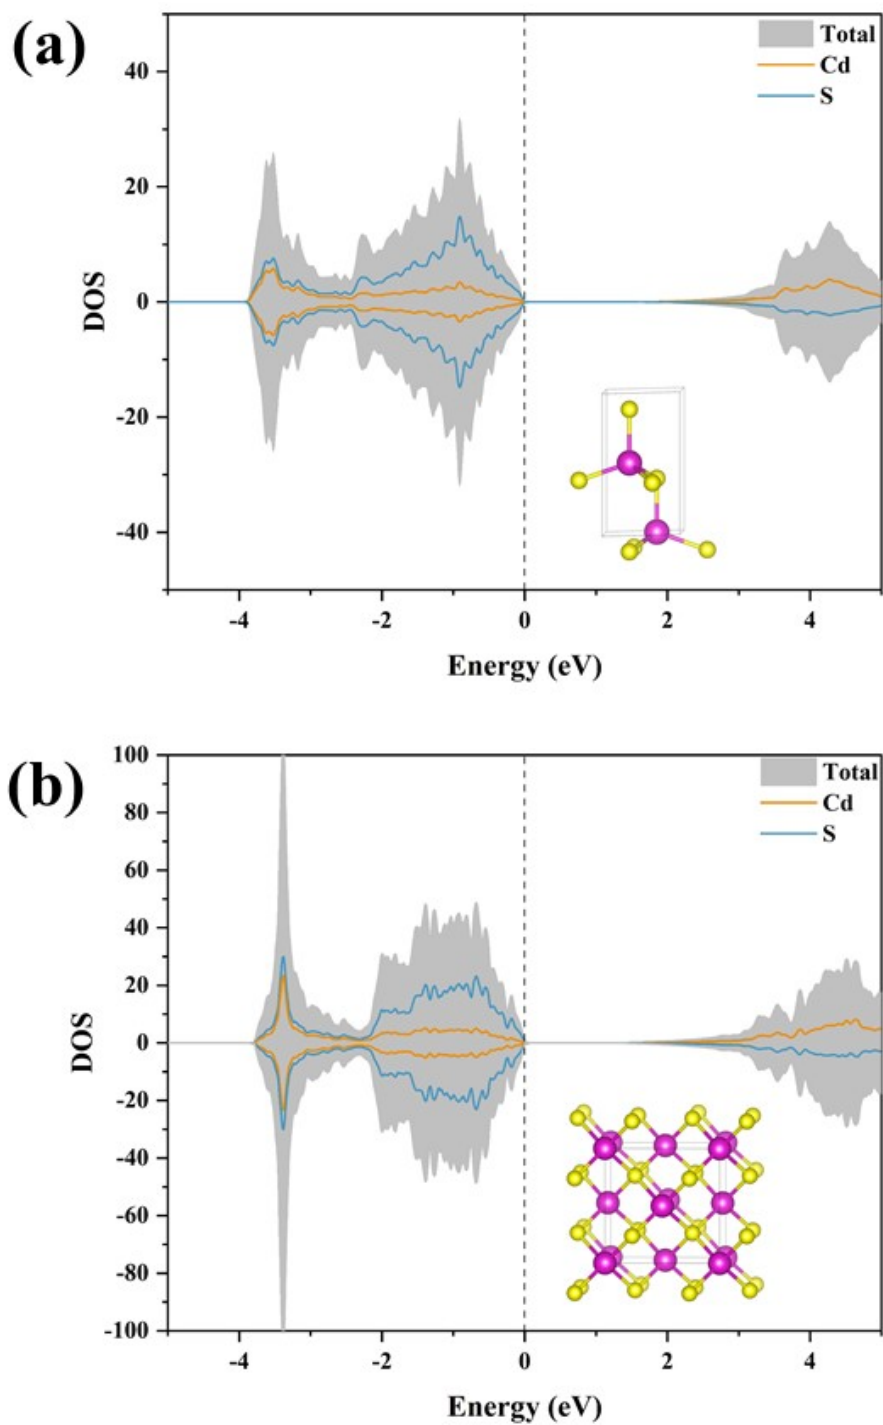

**Fig. S1** The DOS of hexagonal (a) and cubic (b) CdS bulk. Atomic structures of CdS bulk were showed in insets. The magenta, and yellow balls represent Cd and S atoms, respectively.

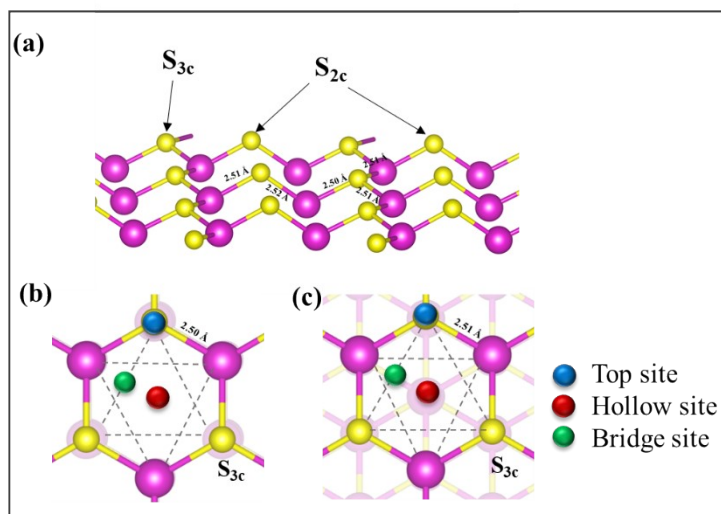

**Fig. S2** Possible adsorption states on the (a)CdS (101), (b) CdS (001), and (c) CdS (111) of the sulfur terminations. The magenta, and yellow balls represent Cd and S atoms, respectively.

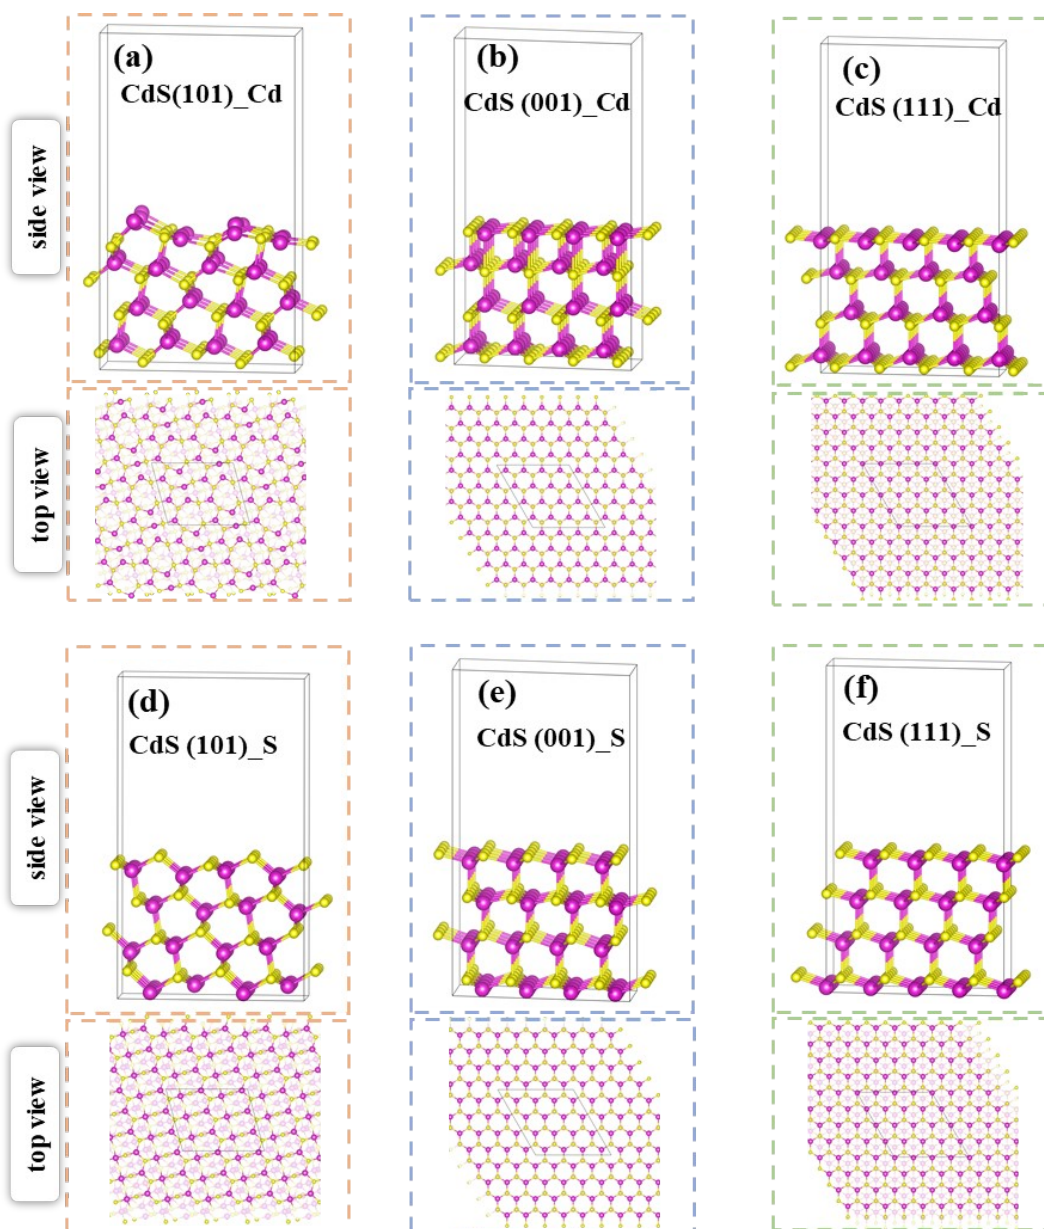

**Fig. S3** Top and side views of the slab models of hexagonal (a-b, d-e) and cubic (c, f) CdS with different exposed facets. The magenta, and yellow balls represent Cd and S atoms, respectively.

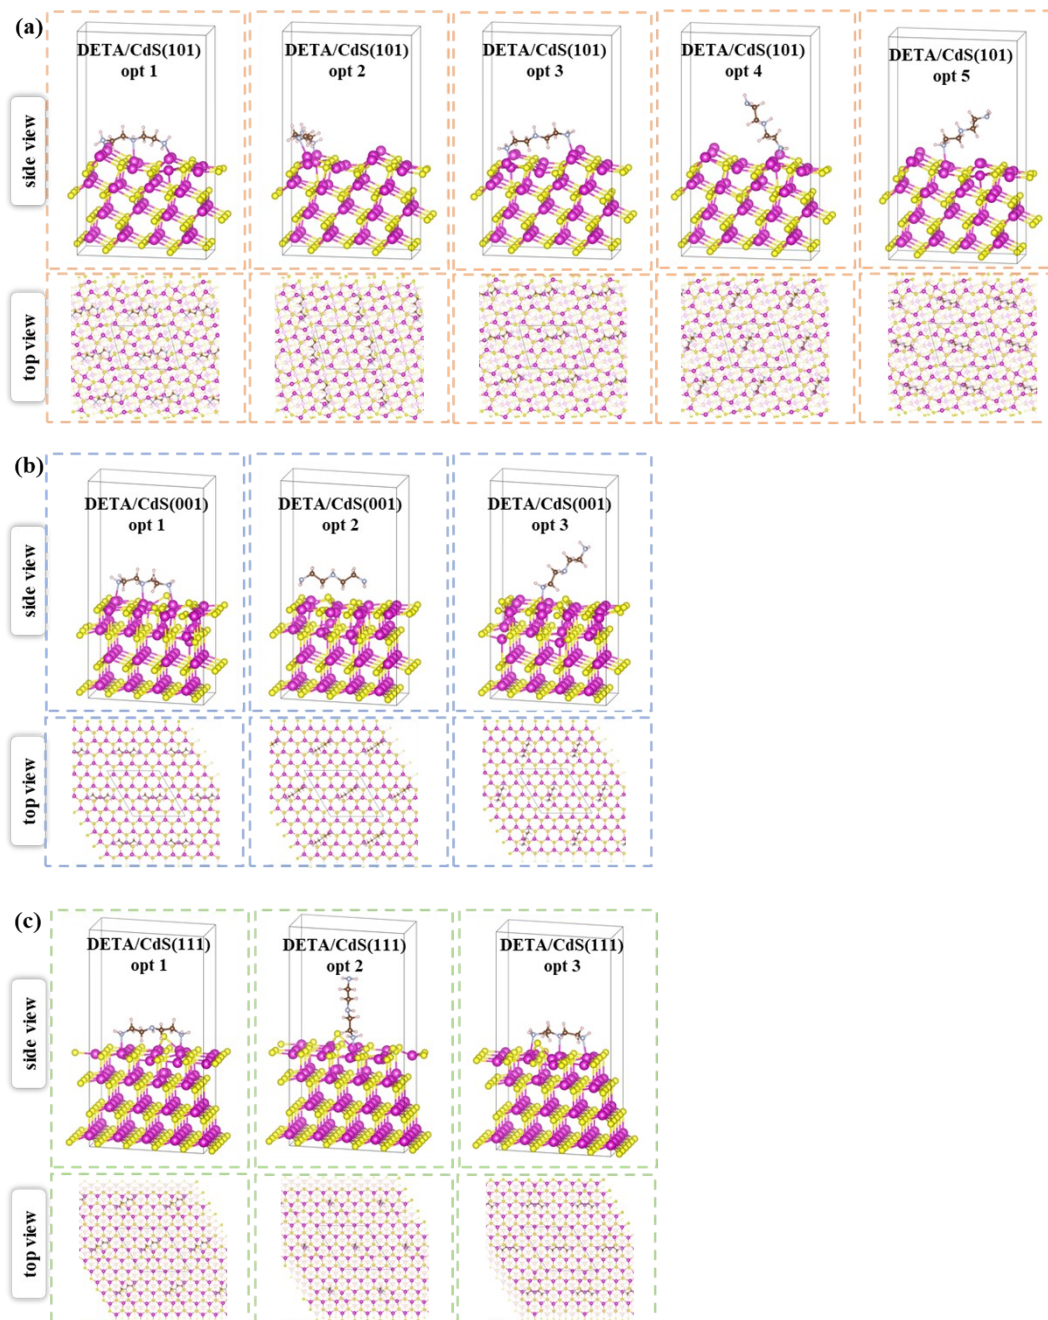

**Fig. S4** Top and side views of chemisorption configuration of the (a)DETA/CdS (101), (b) DETA/CdS (001), and (c) DETA/CdS (111). The gray, brown, white, magenta, and yellow balls represent N, C, H, Cd and S atoms, respectively.

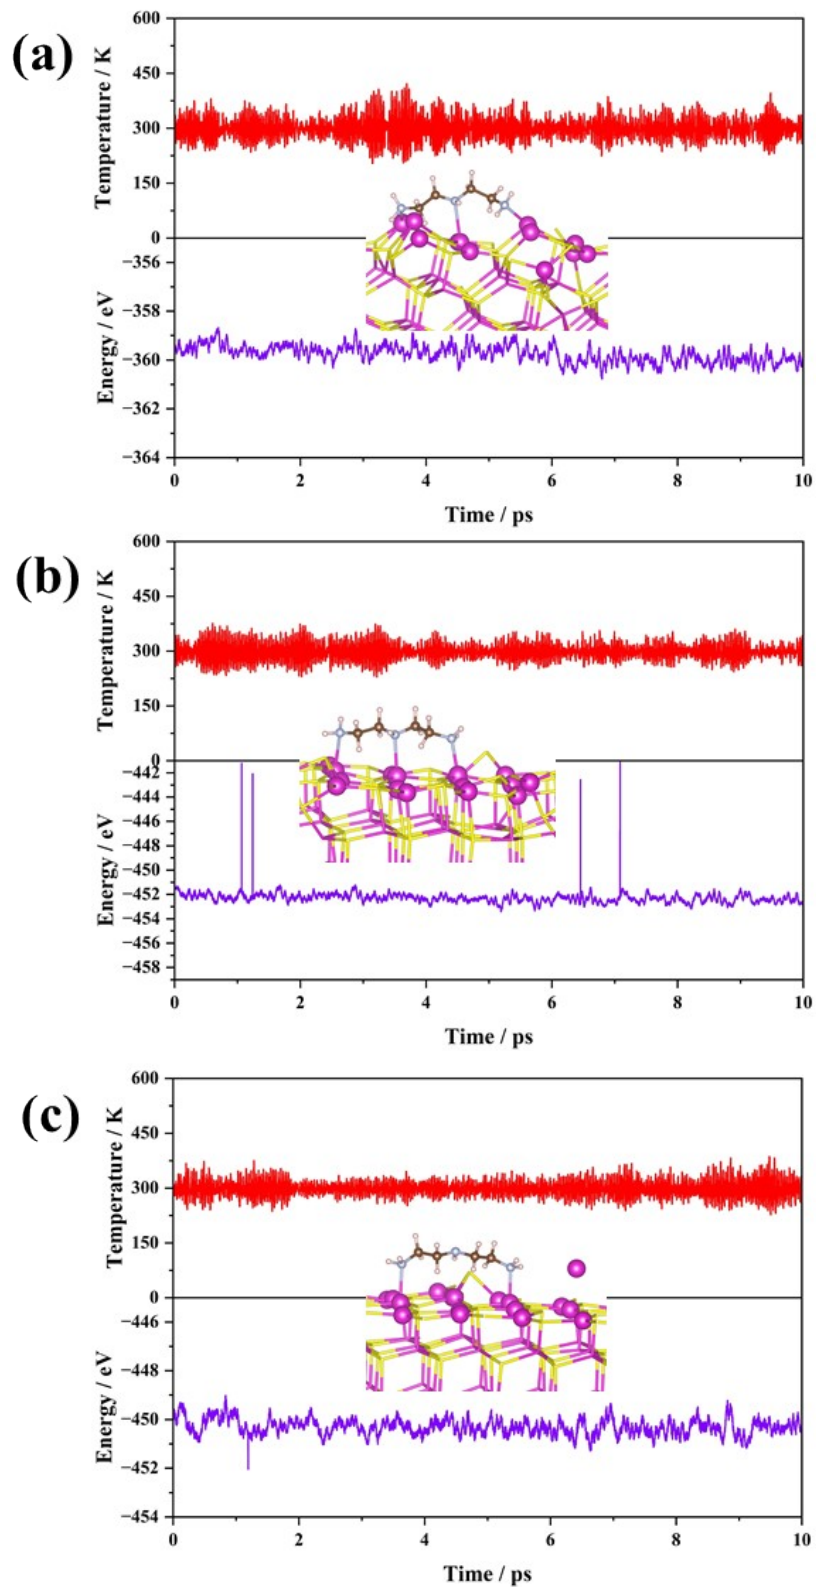

**Fig. S5** Alteration of temperature and energy by AIMD simulations of the (a) DETA/CdS (101), (b) DETA/CdS (001), and (c) DETA/CdS (111); the simulation is going at 300 K for 10 ps with a time step of 1 fs. The gray, brown, white, magenta, and yellow balls represent N, C, H, Cd and S atoms, respectively.

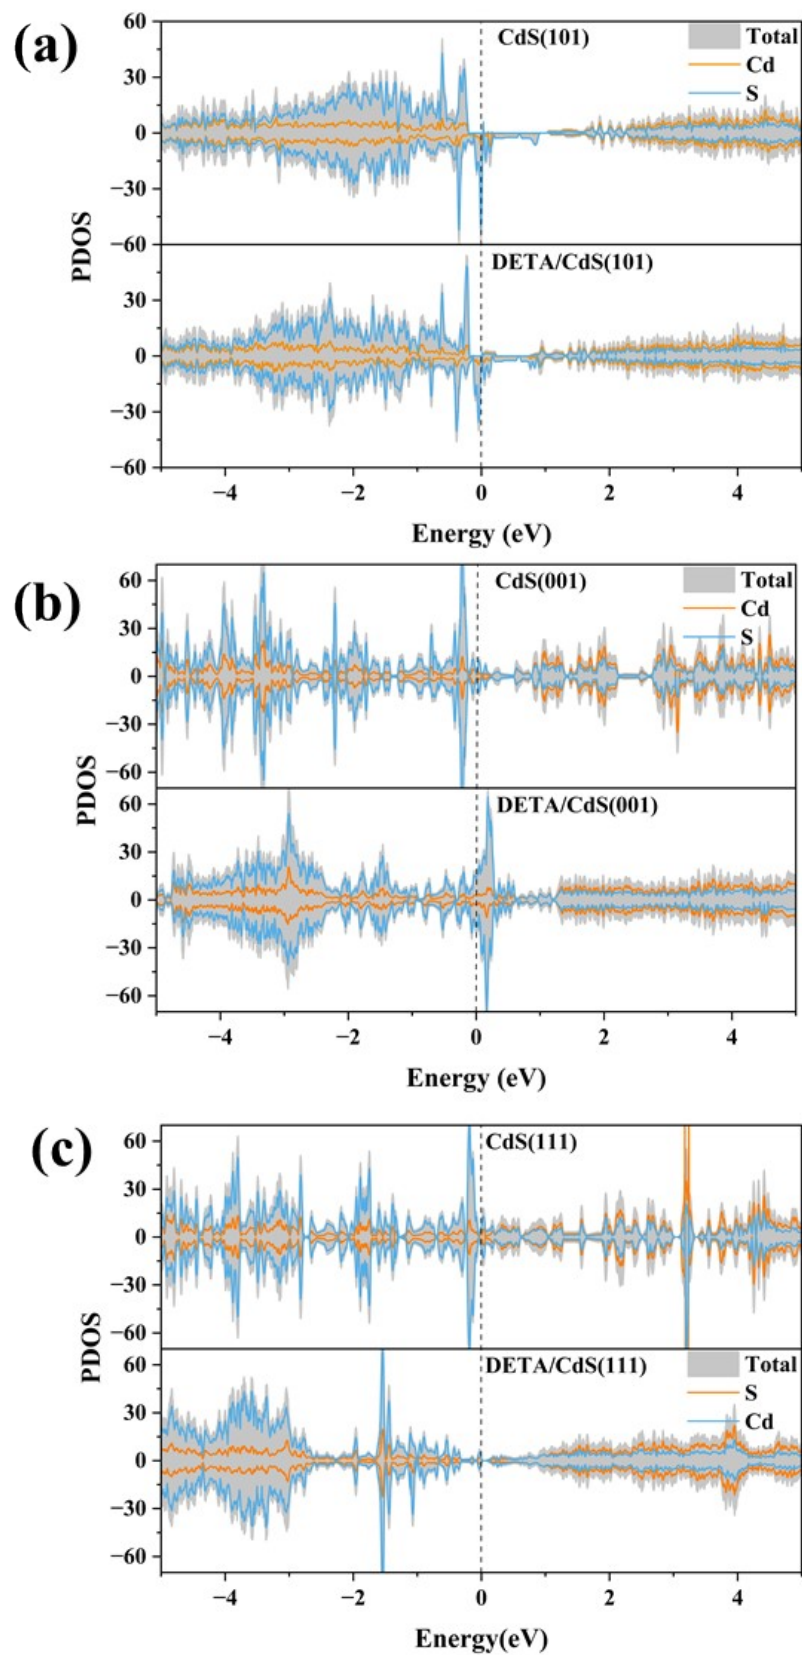

**Fig. S6.** PDOS of the conformation of DETA molecules before and after adsorption on the (a)CdS (101), (b) CdS (001), and (c)CdS (111) surface.

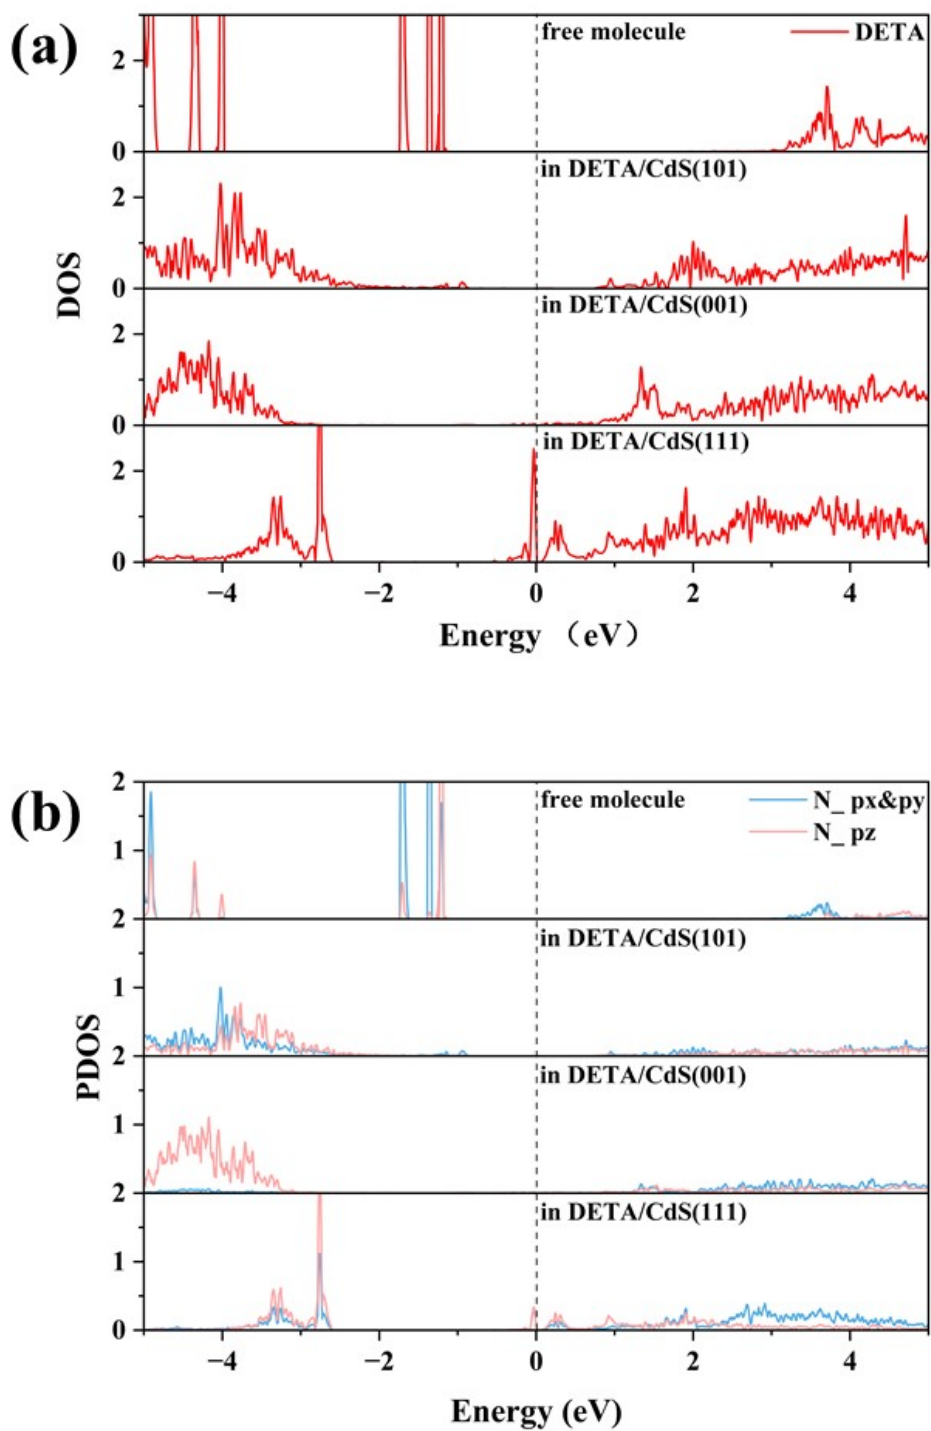

**Fig. S7.** (a) DOS of the adsorption configurations of DETA molecules on the CdS surface and (b) PDOS of N atoms.



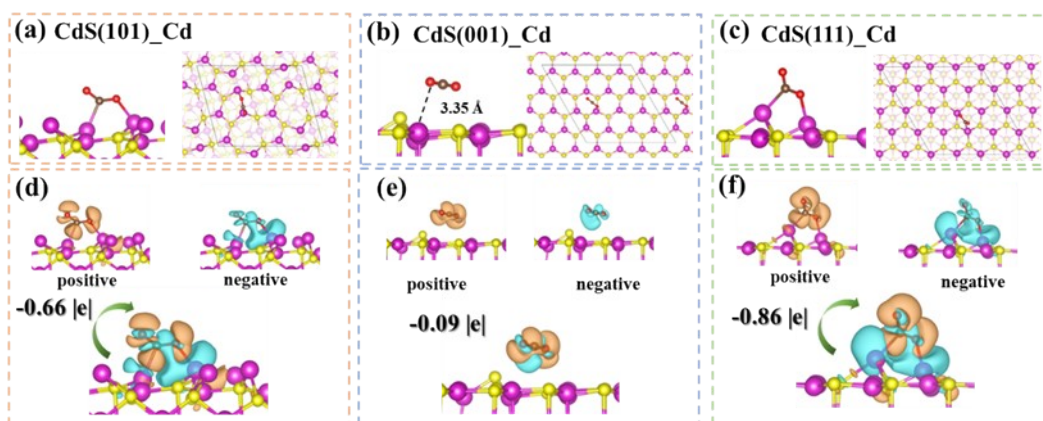

**Fig. S8** The most stable adsorption configurations of CO<sub>2</sub> on CdS (a-c) and (d-f) charge density difference with the isovalues were set to 0.001 e Å<sup>-3</sup>. Orange and cyan represent gaining and losing electrons, respectively. The red, gray, brown, white, magenta, and yellow balls represent O, N, C, H, Cd and S atoms, respectively.

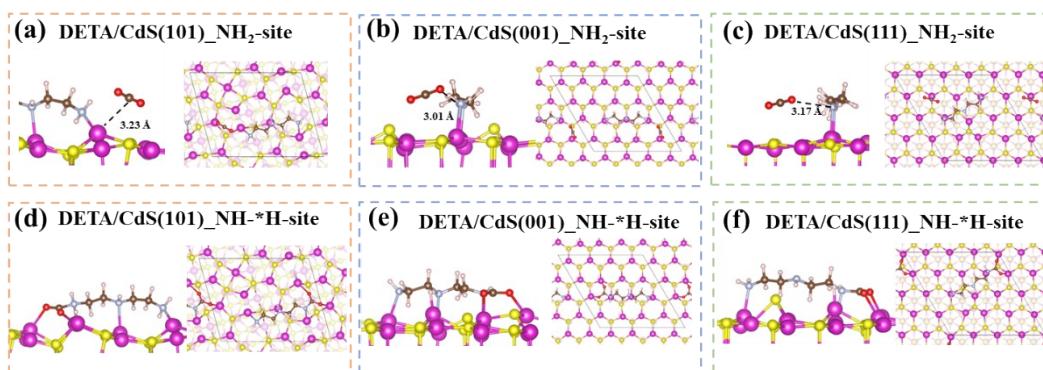

**Fig. S9** The most stable adsorption configurations of CO<sub>2</sub> in DETA/CdS N site. The red, gray, brown, white, magenta, and yellow balls represent O, N, C, H, Cd and S atoms, respectively.

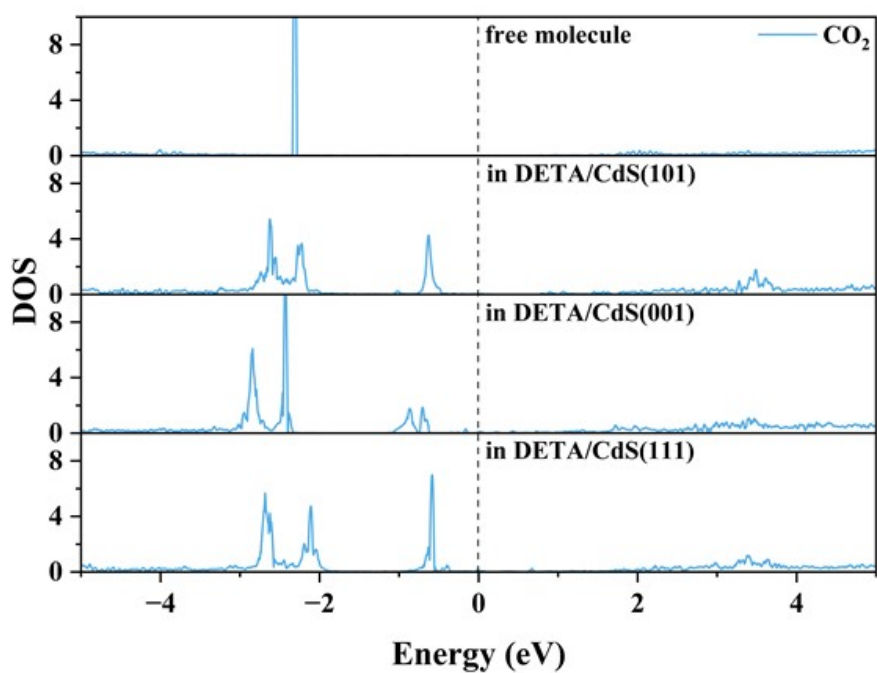

**Fig. S10** DOS of the adsorption configurations of CO<sub>2</sub> molecules on the DETA/CdS surface.

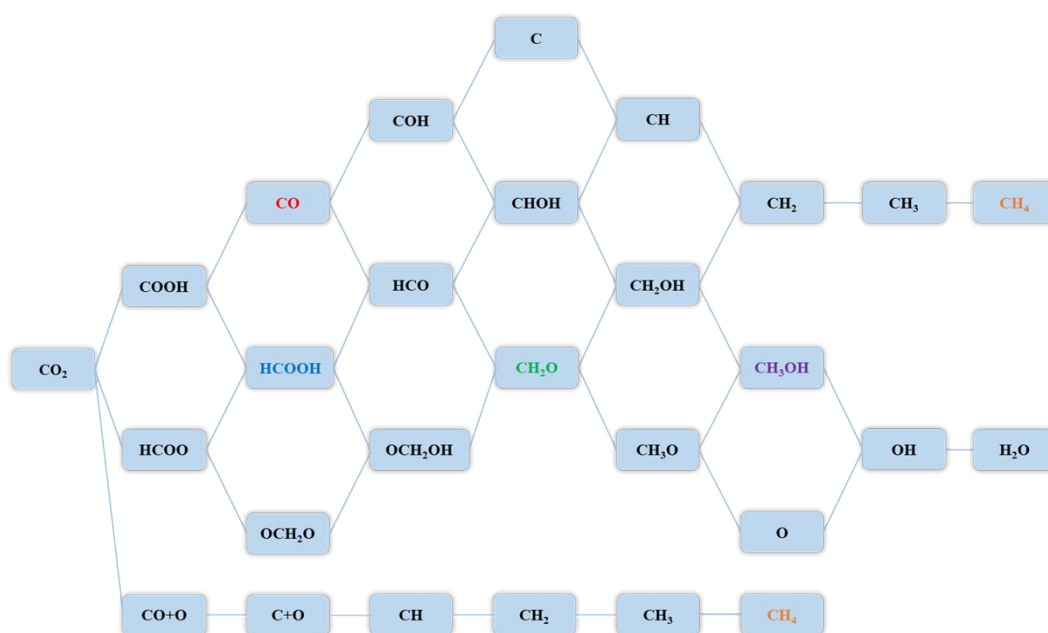

**Fig. S11** Suggested reaction pathways for the CO<sub>2</sub>RR. The initial CO<sub>2</sub> is shown at the center left. The final products are shown in color throughout the figure.

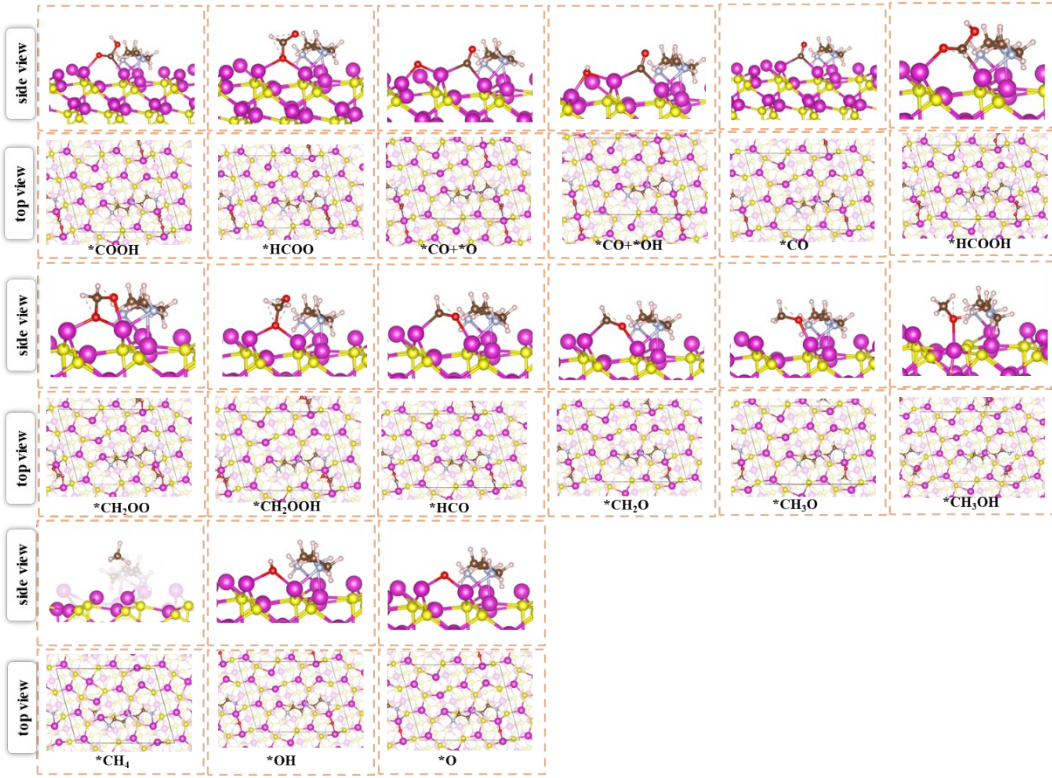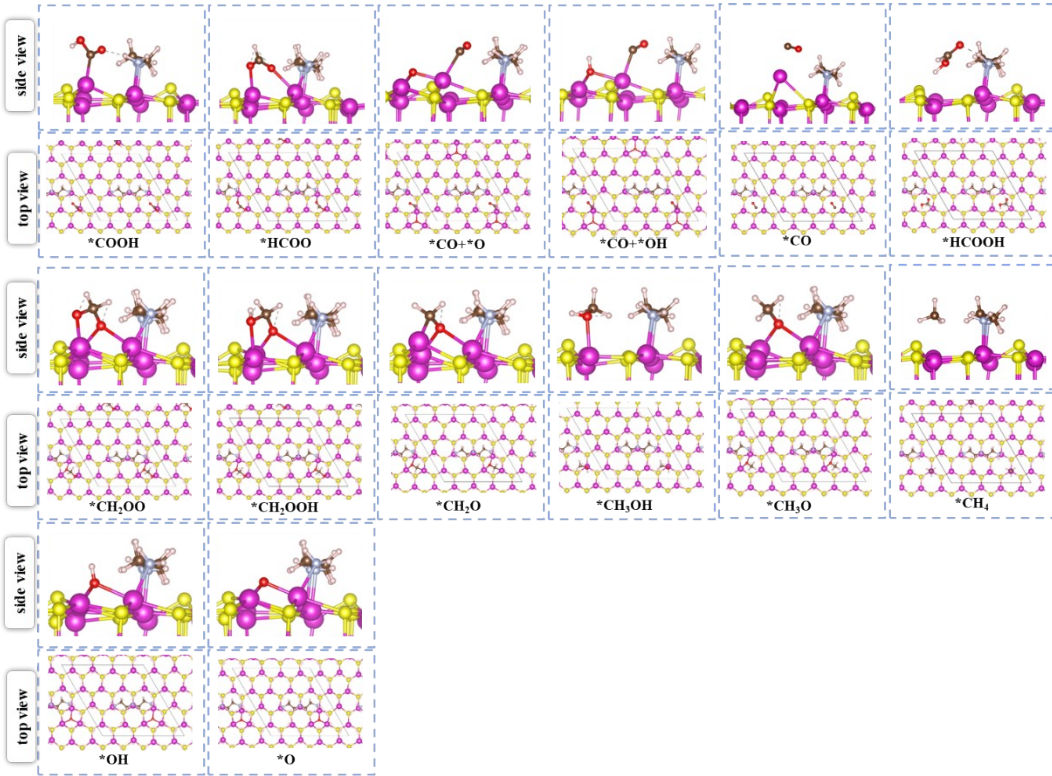

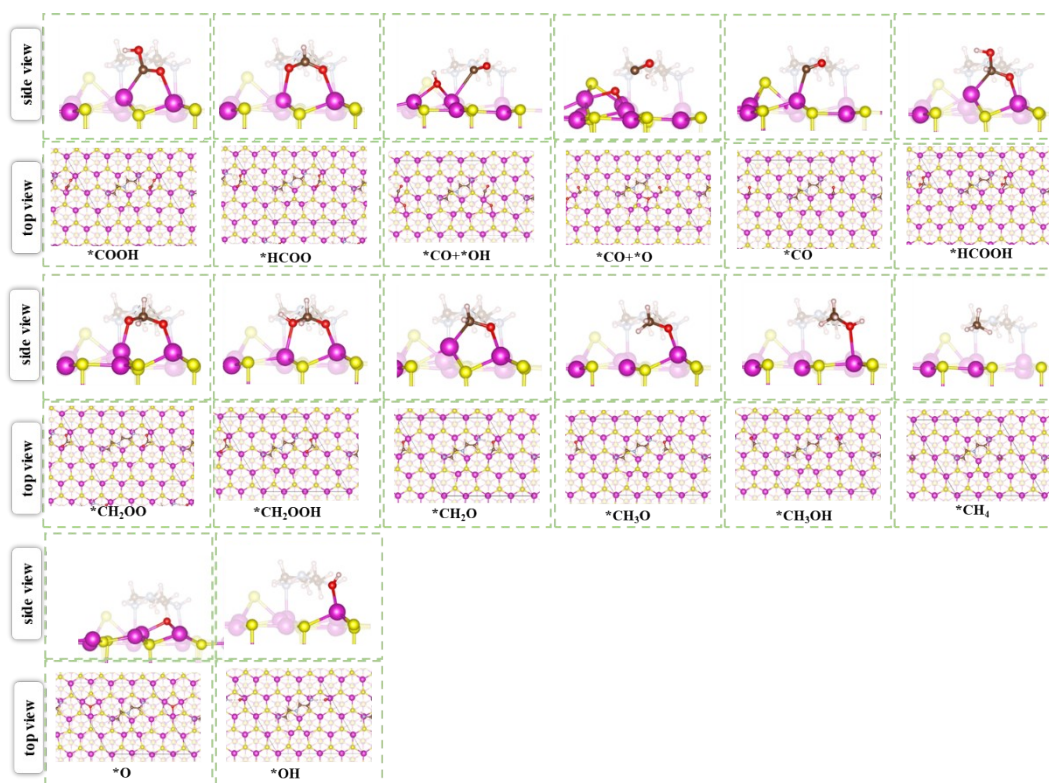

**Fig. S12** Top and side views of the atomic configurations corresponding to different intermediates at each elementary step on the (a) DETA/CdS (101), (b) DETA/CdS (001), and (c) DETA/CdS (111) surface. The red, gray, brown, white, magenta, and yellow balls represent O, N, C, H, Cd and S atoms, respectively.

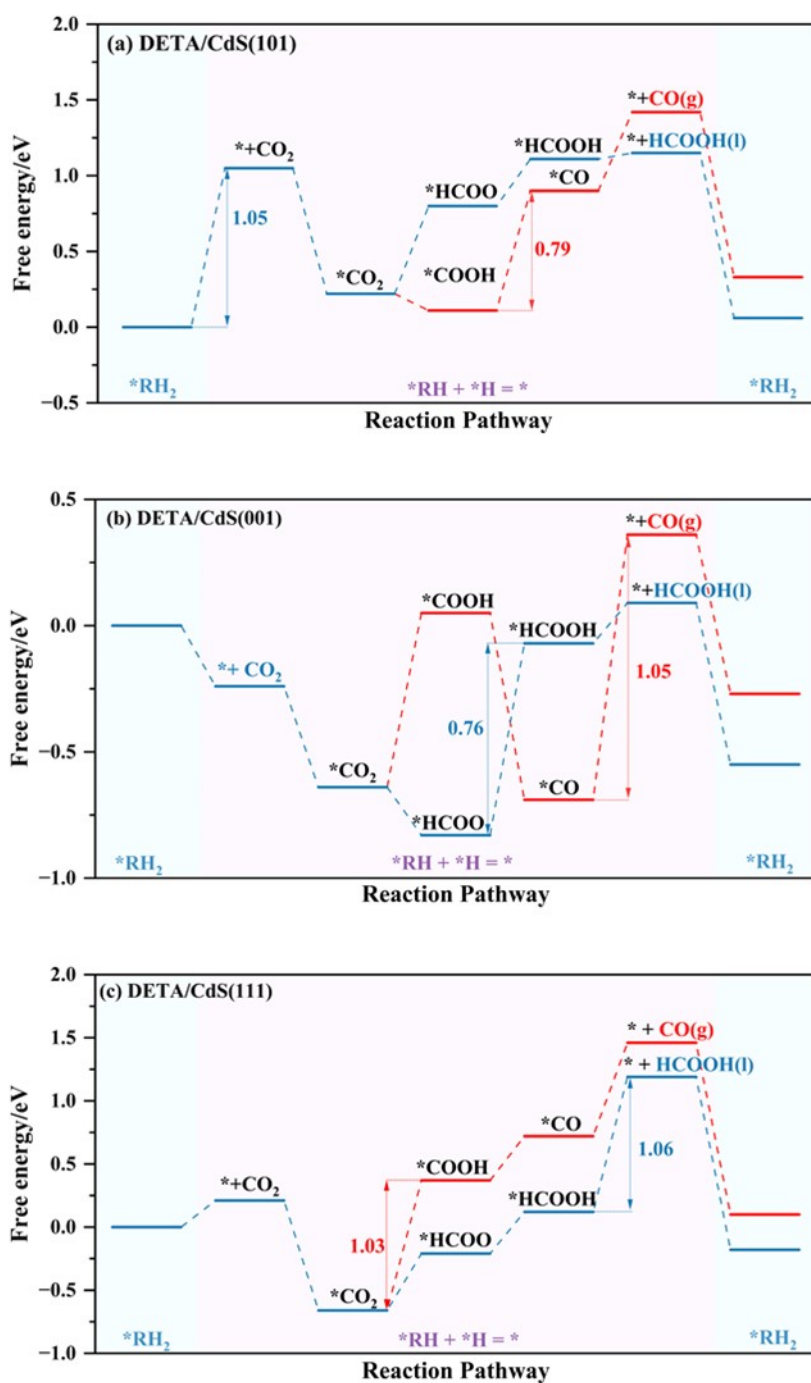

**Fig. S13** Free energy diagrams for CO<sub>2</sub>RR at the \*RH<sub>2</sub>→\*RH+\*H sites on the (a)DETA/CdS (101), (b) DETA/CdS (001), and (c) DETA/CdS (111) surface.

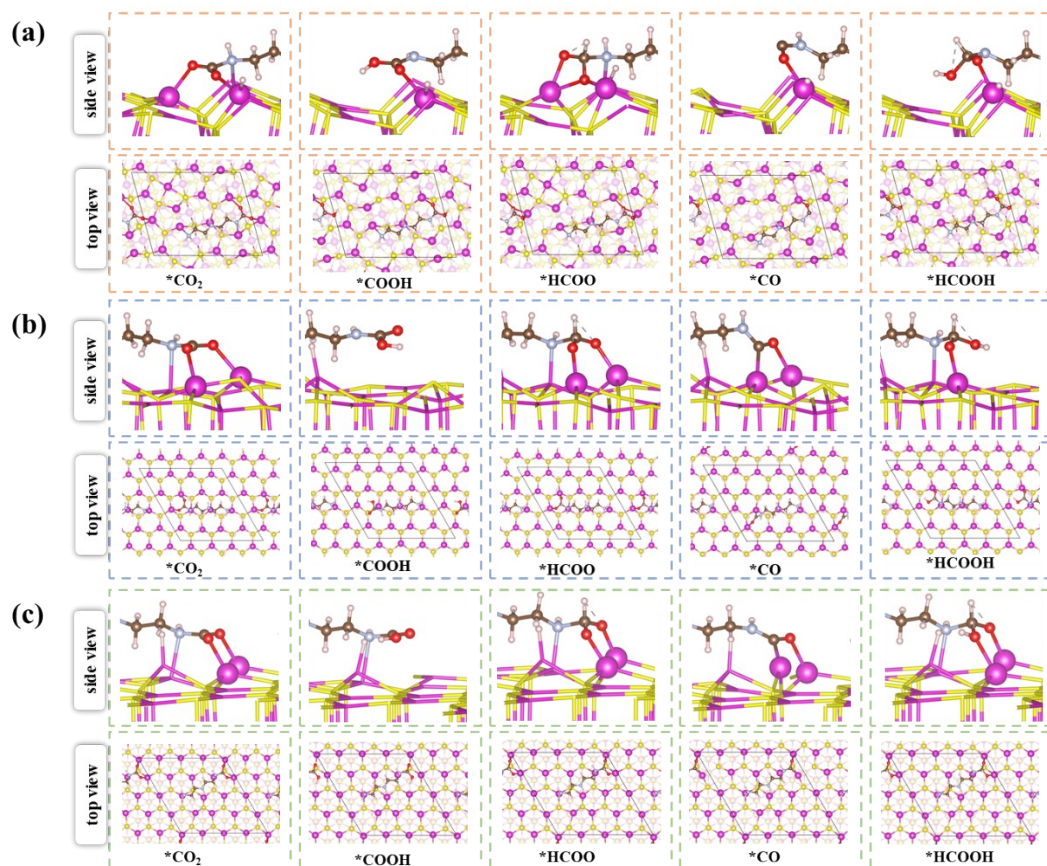

**Fig. S14** Top and side views of the atomic configurations corresponding to different intermediates at each elementary step at the  $*RH_2 \rightarrow *RH + *H$  sites on the (a)DETA/CdS(101), (b)DETA/CdS (001), and (c) DETA/CdS (111) surface. The red, gray, brown, white, magenta, and yellow balls represent O, N, C, H, Cd and S atoms, respectively.

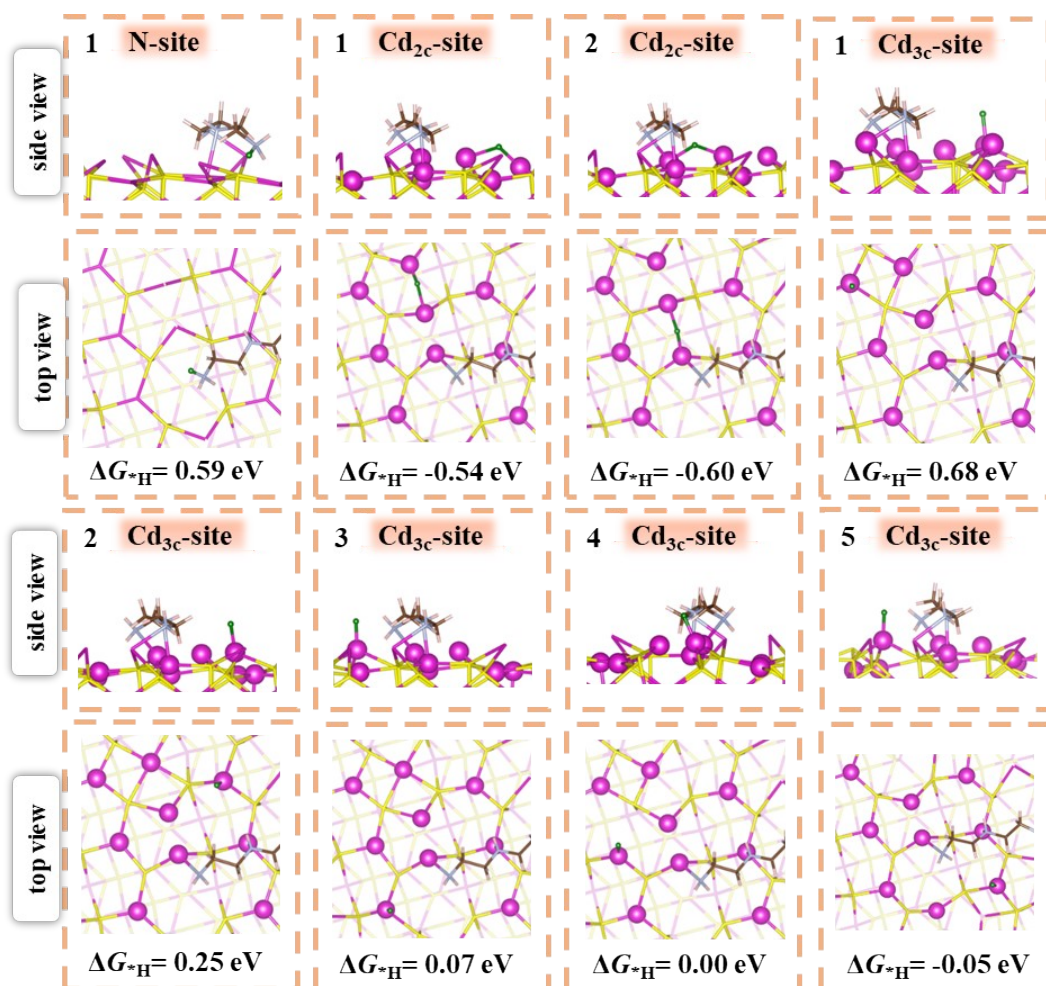

**Fig. S15.** Top and side views of the H adsorption structures and  $\Delta G_{*H}$  at different sites of DETA/CdS(101), respectively. Green ball represents adsorbed H atom.

**Table S1** Energy and structural information of DETA/CdS, where  $E_{\text{relative}}$  (eV) represents the relative energy compared to opt1 and bond length(Å) of DETA absorbed on CdS.

| Surfaces      |      | $E_{\text{relative}}$<br>(eV) | N-Cd/Å           |
|---------------|------|-------------------------------|------------------|
| DETA/CdS(101) | opt1 | 0.00                          | 2.45, 2.55, 2.39 |
|               | opt2 | 0.13                          | 2.40, -, 2.33    |
|               | opt3 | 0.43                          | 2.35, -, 2.45    |
|               | opt4 | 0.85                          | 2.34             |
|               | opt5 | 0.98                          | 2.38             |
| DETA/CdS(001) | opt1 | 0.00                          | 2.44, 2.48, 2.44 |
|               | opt2 | 1.13                          | -                |
|               | opt3 | 0.68                          | 2.37             |
| DETA/CdS(111) | opt1 | 0.00                          | 2.37, -, 2.37    |
|               | opt2 | 1.56                          | 2.28             |
|               | opt3 | 0.02                          | 2.43, 2.46, 2.44 |

**Table S2** Adsorption energy of ( $E_{\text{ads}}$ ) of CO<sub>2</sub>, C-O bond lengths (Å),  $\angle$ O-C-O (°), bond angles(Å), and adsorption bond lengths (Å) of CO<sub>2</sub> absorbed on the DETA/CdS surface.

| Surfaces                  | $E_{\text{ads}}$<br>(eV) | C-O <sub>a</sub> | C-O <sub>b</sub> | $\angle$ O-C-O | Cd-C | Cd-O <sub>a</sub> | Cd-O <sub>b</sub> | N-C |
|---------------------------|--------------------------|------------------|------------------|----------------|------|-------------------|-------------------|-----|
| CdS(101)                  | -0.30                    | 1.26             | 1.22             | 136.14         | 2.34 | 2.24              | -                 | -   |
| CdS(001)                  | -0.69                    | 1.18             | 1.17             | 178.98         | -    | -                 | -                 | -   |
| CdS(111)                  | -1.41                    | 1.29             | 1.22             | 128.88         | 2.30 | 2.18              | -                 | -   |
| DETA/CdS(101)<br>_Cd-site | -0.82                    | 1.29             | 1.25             | 124.18         | 2.26 | 2.14              | -                 | -   |
| DETA/CdS(001)<br>_Cd-site | -1.80                    | 1.30             | 1.23             | 127.07         | 2.25 | 2.28              | -                 | -   |



|                                         |       |      |      |        |      |      |      |      |
|-----------------------------------------|-------|------|------|--------|------|------|------|------|
| DETA/CdS(111)<br>_Cd-site               | -1.49 | 1.32 | 1.24 | 122.57 | 2.26 | 2.19 | -    | -    |
| DETA/CdS(101)<br>_NH <sub>2</sub> -site | 0.20  | 1.18 | 1.18 | 177.47 | -    | -    | -    | -    |
| DETA/CdS(001)<br>_NH <sub>2</sub> -site | -0.18 | 1.18 | 1.18 | 178.51 | -    | -    | -    | -    |
| DETA/CdS(111)<br>_NH <sub>2</sub> -site | -0.15 | 1.17 | 1.18 | 179.18 | -    | -    | -    | -    |
| DETA/CdS(101)<br>_NH-*H-site            | -1.29 | 1.26 | 1.27 | 128.66 | -    | 2.47 | 2.35 | 1.46 |
| DETA/CdS(001)<br>_NH-*H-site            | -0.98 | 1.26 | 1.27 | 129.30 | -    | 2.43 | 2.35 | 1.45 |
| DETA/CdS(111)<br>_NH-*H-site            | -1.47 | 1.28 | 1.27 | 127.91 | -    | 2.32 | 2.30 | 1.43 |

**Table S3** Bader charge of CO<sub>2</sub>, C, O<sub>a</sub> and O<sub>b</sub> atoms after CO<sub>2</sub> adsorption on CdS and DETA/CdS surfaces.

| <b>Surfaces</b> | <b>CO<sub>2</sub></b> | <b>C</b> | <b>O<sub>a</sub></b> | <b>O<sub>b</sub></b> |
|-----------------|-----------------------|----------|----------------------|----------------------|
| CdS(101)        | -0.66                 | +0.65    | -0.67                | -0.64                |
| CdS(001)        | -0.09                 | +1.35    | -0.68                | -0.76                |
| CdS(111)        | -0.86                 | +1.00    | -0.99                | -0.87                |
| DETA/CdS(101)   | -0.93                 | +1.33    | -1.13                | -1.13                |
| DETA/CdS(001)   | -0.90                 | +1.39    | -1.17                | -1.12                |
| DETA/CdS(111)   | -0.97                 | +1.31    | -1.14                | 1.14                 |

**Table S4** Energy corrections of free molecules to the free energies.  $E$ ,  $E_{\text{sol}}$ ,  $ZPE$ ,  $TS$ , and  $G$  are the total electronic energy(eV), the solvation energy correction(eV), the zero-point energy(eV), the entropy correction(eV), and free energy (eV) at 298.15 K, respectively.

| Free molecules                    | $E$ (eV) | $E_{\text{sol}}$ (eV) | $ZPE$ (eV) | $TS$ (eV) | $G$ (eV) |
|-----------------------------------|----------|-----------------------|------------|-----------|----------|
| H <sub>2(g)</sub>                 | -6.67    | -6.75                 | 0.27       | 0.40      | -6.80    |
| CO <sub>2(g)</sub>                | -22.99   | -23.08                | 0.21       | 0.73      | -23.49   |
| CO <sub>(g)</sub>                 | -14.80   | -14.80                | 0.13       | 0.61      | -15.19   |
| CH <sub>2</sub> O <sub>(g)</sub>  | -22.16   | -22.30                | 0.7        | 0.68      | -22.17   |
| CH <sub>4(g)</sub>                | -24.05   | -24.03                | 1.17       | 0.58      | -23.33   |
| H <sub>2</sub> O <sub>(l)</sub>   | -14.22   | -14.49                | 0.56       | 0.67      | -14.50   |
| HCOOH <sub>(l)</sub>              | -29.77   | -30.18                | 0.88       | 0.77      | -29.96   |
| CH <sub>3</sub> OH <sub>(l)</sub> | -30.25   | -30.42                | 1.35       | 0.79      | -29.73   |
| DETA <sub>(l)</sub>               | -108.98  | -108.89               | 4.88       | 1.22      | 104.96   |

**Table S5** Electronic energies ( $E$ ), free energy ( $G$ ), and corresponding thermodynamic energy corrections for the intermediate states where the \* refers to adsorption on the surface.  $E$ ,  $E_{\text{sol}}$ ,  $ZPE$ ,  $TS$ , and  $G$  are the total electronic energy(eV), the solvation energy correction(eV), the zero-point energy(eV), the entropy correction(eV), and free energy (eV) at 298.15 K, respectively.

| Surfaces          | Intermediate state         | $E$ (eV) | $E_{\text{sol}}$ (eV) | $ZPE$ (eV) | $TS$ (eV) | $G$ (eV) |
|-------------------|----------------------------|----------|-----------------------|------------|-----------|----------|
| CdS(101)          | clean surface              | -251.98  | -252.15               | -          | -         | -        |
|                   | *CO <sub>2</sub>           | -275.02  | -275.52               | -          | -         | -        |
|                   | *H                         | -256.02  | -256.21               | 0.16       | 0.01      | -256.05  |
| DETA/Cd<br>S(101) | clean surface              | -362.92  | -362.94               | -          | -         | -        |
|                   | *CO <sub>2</sub> (Cd-site) | -386.02  | -386.84               | 0.29       | 0.21      | -386.66  |
|                   | *CO <sub>2</sub> (N-site)  | -385.65  | -385.82               | 0.20       | 0.32      | -385.60  |

| Surfaces | Intermediate state         | $E$ (eV) | $E_{\text{sol}}$ (eV) | $ZPE$ (eV) | $TS$ (eV) | $G$ (eV) |
|----------|----------------------------|----------|-----------------------|------------|-----------|----------|
|          | *COOH                      | -390.21  | -390.05               | 0.59       | 0.189     | -389.55  |
|          | *OCHO                      | -390.98  | -390.93               | 0.61       | 0.21      | -390.42  |
|          | *CO+*O                     | -384.81  | -385.41               | 0.24       | 0.23      | -385.29  |
|          | *HCOOH                     | -393.11  | -393.16               | 0.89       | 0.24      | -392.39  |
|          | *OCH <sub>2</sub> O        | -393.47  | -393.89               | 0.88       | 0.21      | -393.11  |
|          | *CO+*OH                    | -389.39  | -389.66               | 0.54       | 0.23      | -389.23  |
|          | *CO                        | -377.81  | -377.96               | 0.21       | 0.10      | -377.80  |
|          | *CHO                       | -381.87  | -382.7                | 0.46       | 0.14      | -381.78  |
|          | *HOCH <sub>2</sub> O       | -397.94  | -398.15               | 1.24       | 0.23      | -397.02  |
|          | *CH <sub>2</sub> O         | -386.04  | -385.49               | 0.74       | 0.18      | -384.84  |
|          | *CH <sub>2</sub> OH        | -389.56  | -389.40               | 1.10       | 0.17      | -388.38  |
|          | *CH <sub>3</sub> O         | -390.22  | -390.48               | 1.05       | 0.21      | -389.54  |
|          | *CH <sub>3</sub> OH        | -393.40  | -393.77               | 1.40       | 0.21      | -392.47  |
|          | *O + CH <sub>4</sub>       | -369.67  | -370.18               | 0.06       | 0.06      | -370.15  |
|          | *OH                        | -374.96  | -375.17               | 0.36       | 0.09      | -374.85  |
| DETA/Cd  | *NH+*H(*)                  | 361.77   | -362.04               | 0.15       | 0.02      | -361.90  |
| S(101)_N | *CO <sub>2</sub>           | -386.22  | -386.40               | 0.32       | 0.22      | -386.21  |
| H-*H     | *COOH                      | -390.13  | 390.32                | 0.67       | 0.15      | -389.72  |
|          | *OCHO                      | -389.03  | -389.62               | 0.64       | 0.12      | -389.04  |
|          | *HCOOH                     | -392.56  | -392.99               | 0.94       | 0.17      | -392.12  |
|          | *CO                        | -377.01  | -377.83               | 0.21       | 0.10      | -377.83  |
| CdS(001) | clean surface              | -343.52  | -343.25               | -          | -         | -        |
|          | *CO <sub>2</sub>           | -367.14  |                       | -          | -         | -        |
|          | *H                         | -347.48  | -347.43               | 0.13       | 0.04      | -347.31  |
| DETA/Cd  | clean surface              | -454.93  | -454.76               | -          | -         | -        |
| S(001)   | *CO <sub>2</sub> (Cd-site) | -478.85  | -479.64               | 0.28       | 0.16      | -479.43  |

| Surfaces | Intermediate state        | $E$ (eV) | $E_{\text{sol}}$ (eV) | $ZPE$ (eV) | $TS$ (eV) | $G$ (eV) |
|----------|---------------------------|----------|-----------------------|------------|-----------|----------|
|          | *CO <sub>2</sub> (N-site) | -478.18  | -478.01               | 0.32       | 0.22      | -477.82  |
|          | *COOH                     | -482.18  | -482.37               | 0.59       | 0.13      | -481.84  |
|          | *OCHO                     | -483.25  | -483.17               | 0.60       | 0.23      | -482.69  |
|          | *CO+*O                    | -477.65  | -477.75               | 0.21       | 0.20      | 0.11     |
|          | *HCOOH                    | -485.69  | -486.69               | 0.90       | 0.28      | -484.95  |
|          | *OCH <sub>2</sub> O       | -486.50  | -486.72               | 0.89       | 0.19      | -485.92  |
|          | *CO+*OH                   | -481.79  | -481.57               | 0.47       | 0.26      | -481.23  |
|          | *CO                       | -470.54  | -470.59               | 0.14       | 0.20      | -470.56  |
|          | *OH                       | -466.50  | -466.27               | 0.33       | 0.09      | -465.98  |
|          | *HOCH <sub>2</sub> O      | -489.80  | -489.63               | 1.19       | 0.26      | -488.56  |
|          | *CH <sub>2</sub> O        | -478.78  | -478.67               | 0.76       | 0.13      | -477.96  |
|          | *CH <sub>2</sub> OH       | -482.21  | -482.07               | 1.08       | 0.2       | -481.09  |
|          | *CH <sub>3</sub> O        | -482.73  | -482.54               | 1.06       | 0.22      | -481.59  |
|          | *CH <sub>3</sub> OH       | -485.88  | -485.78               | 1.41       | 0.27      | -484.51  |
|          | *O + CH <sub>4</sub>      | -462.61  | -462.63               | 0.07       | 0.05      | -462.59  |
|          | *OH                       | -466.61  | -466.45               | 0.33       | 0.09      | -466.16  |
| DETA/Cd  | *NH+*H(*)                 | -454.92  | -455.13               | 0.14       | 0.03      | -455.00  |
| S(001)_N | *CO <sub>2</sub>          | -478.99  | -479.19               | 0.36       | 0.13      | -478.88  |
| H-*H     | *COOH                     | -482.04  | -482.18               | 0.67       | 0.18      | -481.60  |
|          | *OCHO                     | -482.57  | -482.96               | 0.57       | 0.18      | -482.48  |
|          | *HCOOH                    | -485.94  | -485.97               | 0.93       | 0.18      | -485.11  |
|          | *CO                       | -471.49  | -471.44               | 0.24       | 0.08      | -471.23  |
| CdS(111) | clean surface             | -341.21  | -340.93               | -          | -         | -        |
|          | *CO <sub>2</sub>          | -365.41  | -366.18               | -          | -         | -        |
|          | *H                        | -345.43  | -345.37               | 0.13       | 0.04      | -345.26  |
| DETA/Cd  | clean surface             | -453.58  | -453.60               | 5.01       | 0.51      | -453.60  |

| Surfaces         | Intermediate state         | $E$ (eV) | $E_{\text{sol}}$ (eV) | $ZPE$ (eV) | $TS$ (eV) | $G$ (eV) |
|------------------|----------------------------|----------|-----------------------|------------|-----------|----------|
| S(111)           | *CO <sub>2</sub> (Cd-site) | -477.39  | -478.17               | 0.29       | 0.19      | -477.97  |
|                  | *CO <sub>2</sub> (N-site)  | -476.80  | -476.83               | 0.32       | 0.27      | -476.66  |
|                  | *COOH                      | -480.76  | -481.01               | 0.61       | 0.22      | -480.51  |
|                  | *OCHO                      | -482.00  | -482.13               | 0.60       | 0.23      | -481.65  |
|                  | *CO+*O                     | -475.25  | -475.62               | 0.21       | 0.25      | -475.54  |
|                  | *HCOOH                     | -484.07  | -484.45               | 0.88       | 0.21      | -483.66  |
|                  | *OCH <sub>2</sub> O        | -485.06  | -485.63               | 0.90       | 0.18      | -484.81  |
|                  | *CO+*OH                    | -480.13  | -480.13               | 0.49       | 0.29      | -479.79  |
|                  | *CO                        | -468.52  | -458.53               | 0.15       | 0.21      | -468.50  |
|                  | *OH                        | -465.14  | -465.26               | 0.34       | 0.10      | -464.97  |
|                  | *HOCH <sub>2</sub> O       | -488.82  | -488.91               | 1.21       | 0.23      | -487.81  |
|                  | *CH <sub>2</sub> O         | -477.24  | -477.47               | 0.77       | 0.13      | -476.76  |
|                  | *CH <sub>2</sub> OH        | -480.64  | -480.67               | 1.08       | 0.18      | -479.68  |
|                  | *CH <sub>3</sub> O         | -481.50  | -481.66               | 1.06       | 0.22      | -480.71  |
|                  | *CH <sub>3</sub> OH        | -484.34  | -484.33               | 1.40       | 0.29      | -483.10  |
|                  | *O + CH <sub>4</sub>       | -461.08  | -461.41               | 0.07       | 0.04      | -461.36  |
|                  | *OH                        | -465.20  | -465.28               | 0.33       | 0.09      | -464.98  |
| DETA/Cd          | *NH+*H(*)                  | -452.90  | -453.51               | 0.14       | 0.04      | -453.39  |
| S(111)_N<br>H-*H | *CO <sub>2</sub>           | -477.58  | -478.06               | 0.36       | 0.12      | -477.75  |
|                  | *COOH                      | -480.44  | -480.71               | 0.65       | 0.14      | -480.12  |
|                  | *OCHO                      | -480.40  | -481.27               | 0.63       | 0.13      | -480.70  |
|                  | *HCOOH                     | -484.36  | -484.65               | 0.94       | 0.14      | -483.77  |
|                  | *CO                        | -468.57  | -468.88               | 0.24       | 0.07      | -468.67  |

**Table S6** Adsorption energy of ( $E_{\text{ads}}$ ) of CO, HCOOH, CH<sub>2</sub>O, CH<sub>3</sub>OH and CH<sub>4</sub> products.

| <b>Surfaces</b> | <b><math>E_{\text{ads}}</math> (eV)</b> |              |                        |                         |                       |
|-----------------|-----------------------------------------|--------------|------------------------|-------------------------|-----------------------|
|                 | <b>CO</b>                               | <b>HCOOH</b> | <b>CH<sub>2</sub>O</b> | <b>CH<sub>3</sub>OH</b> | <b>CH<sub>4</sub></b> |
| DETA/CdS(101)   | -0.22                                   | -0.04        | -0.25                  | -0.41                   | -0.11                 |
| DETA/CdS(001)   | -0.14                                   | -0.75        | -1.61                  | -0.60                   | -0.14                 |
| DETA/CdS(111)   | -0.13                                   | -0.67        | -1.57                  | -0.31                   | -0.20                 |

**Table S7**  $\Delta G$  in the unit of eV of all intermedia states of the DETA/CdS surfaces compared to  $\text{CO}_2(\text{g})$ .

| $\Delta G$ (eV)                                                                                                    | Cd-site |       |       | NH-*H-site |       |       |
|--------------------------------------------------------------------------------------------------------------------|---------|-------|-------|------------|-------|-------|
|                                                                                                                    | (101)   | (001) | (111) | (101)      | (001) | (111) |
| *+ $\text{H}^+ + \text{e}^- \rightarrow * \text{H}$                                                                | -0.60   | -0.54 | -0.58 | -          | -     | -     |
| *+ $\text{CO}_2 + \text{e}^- \rightarrow * \text{CO} + * \text{O}$                                                 | 1.14    | 0.61  | 1.55  | -          | -     | -     |
| *+ $\text{CO}_2 + \text{H}^+ + \text{e}^- \rightarrow * \text{COOH}$                                               | 0.28    | -0.19 | -0.02 | 0.11       | 0.05  | 0.37  |
| *+ $\text{CO}_2 + \text{H}^+ + \text{e}^- \rightarrow * \text{OCHO}$                                               | -0.59   | -1.14 | -1.17 | 0.80       | -0.83 | -0.21 |
| *+ $\text{CO}_2 + \text{H}^+ + \text{e}^- \rightarrow * \text{CO} + * \text{OH}$                                   | 0.60    | 0.42  | 0.70  | -          | -     | -     |
| *+ $\text{CO}_2 + 2\text{H}^+ + \text{e}^- \rightarrow * + \text{CO}_{(\text{g})} + * \text{OH}$                   | -       | 0.96  | 1.03  | -          | -     | -     |
| *OH + $\text{H}^+ + \text{e}^- \rightarrow * + \text{H}_2\text{O}_{(\text{l})}$                                    | -       | 0.61  | 0.58  | -          | -     | -     |
| *+ $\text{CO}_2 + 2\text{H}^+ + \text{e}^- \rightarrow * \text{CO}_{(\text{g})} + \text{H}_2\text{O}_{(\text{l})}$ | 0.93    | -     | -     | 0.90       | -0.69 | 0.72  |
| * $\text{CO}_{(\text{g})} \rightarrow * + \text{CO}_{(\text{g})}$                                                  | 0.59    | -     | -     | 0.52       | 1.05  | 0.74  |
| *+ $\text{CO}_2 + 2\text{H}^+ + \text{e}^- \rightarrow * \text{HCOOH}_{(\text{g})}$                                | 0.84    | 0.10  | 0.22  | 1.11       | -0.07 | 0.12  |
| * $\text{HCOOH}_{(\text{g})} \rightarrow * + \text{HCOOH}_{(\text{l})}$                                            | 1.50    | 0.24  | 0.08  | 0.04       | 0.15  | 1.06  |
| *+ $\text{CO}_2 + 2\text{H}^+ + \text{e}^- \rightarrow * \text{OCH}_2\text{O}$                                     | 0.12    | -0.88 | -0.93 | -          | -     | -     |
| *+ $\text{CO}_2 + 3\text{H}^+ + \text{e}^- \rightarrow * \text{CHO} + \text{H}_2\text{O}_{(\text{l})}$             | 0.35    | -     | -     | -          | -     | -     |
| *+ $\text{CO}_2 + 3\text{H}^+ + \text{e}^- \rightarrow * \text{HOCH}_2\text{O}$                                    | -0.39   | -0.12 | -0.52 | -          | -     | -     |

|                                                                                                                                   |       |       |       |   |   |   |
|-----------------------------------------------------------------------------------------------------------------------------------|-------|-------|-------|---|---|---|
| $* + \text{CO}_2 + 4\text{H}^+ + \text{e}^- \rightarrow * \text{CH}_2\text{O}_{(\text{g})} + \text{H}_2\text{O}_{(\text{l})}$     | 0.69  | -0.62 | -0.58 | - | - | - |
| $* \text{CH}_2\text{O}_{(\text{g})} \rightarrow * + \text{CH}_2\text{O}_{(\text{g})}$                                             | 1.51  | 1.04  | 0.96  | - | - | - |
| $* + \text{CO}_2 + 5\text{H}^+ + \text{e}^- \rightarrow * \text{CH}_2\text{OH} + \text{H}_2\text{O}_{(\text{l})}$                 | 0.54  | -0.36 | -0.10 | - | - | - |
| $* + \text{CO}_2 + 5\text{H}^+ + \text{e}^- \rightarrow * \text{CH}_3\text{O} + \text{H}_2\text{O}_{(\text{l})}$                  | -0.61 | -0.86 | -1.13 | - | - | - |
| $* + \text{CO}_2 + 6\text{H}^+ + \text{e}^- \rightarrow * \text{CH}_3\text{OH}_{(\text{g})} + \text{H}_2\text{O}_{(\text{l})}$    | -0.15 | -0.38 | -0.12 | - | - | - |
| $* \text{CH}_3\text{OH}_{(\text{g})} \rightarrow * + \text{CH}_3\text{OH}_{(\text{l})}$                                           | 0.98  | 0.56  | 0.55  | - | - | - |
| $* + \text{CO}_2 + 6\text{H}^+ + \text{e}^- \rightarrow * \text{O} + \text{CH}_4_{(\text{g})} + \text{H}_2\text{O}_{(\text{l})}$  | -1.16 | -1.78 | -1.71 | - | - | - |
| $* + \text{CO}_2 + 7\text{H}^+ + \text{e}^- \rightarrow * \text{OH} + \text{CH}_4_{(\text{g})} + \text{H}_2\text{O}_{(\text{l})}$ | -2.46 | -1.95 | -1.93 | - | - | - |
| $* \text{OH} + \text{H}^+ + \text{e}^- \rightarrow * + \text{H}_2\text{O}_{(\text{l})}$                                           | -1.66 | -1.65 | -1.68 | - | - | - |



**Table S8**  $\Delta G$  of the first protonation step for the HER and CO<sub>2</sub>RR.

| Surfaces      | $\Delta G_{*H}$ (eV) | $\Delta G_{*OCHO}$ (eV) | $\Delta G_{*COOH}$ (eV) |
|---------------|----------------------|-------------------------|-------------------------|
| DETA/CdS(101) | -0.60                | -0.37                   | 0.51                    |
| DETA/CdS(001) | -0.54                | 0.14                    | 1.00                    |
| DETA/CdS(111) | -0.58                | -0.29                   | 0.86                    |

1. A. Kokalj, T. Makino and M. Okada, *J. Phys.: Condens. Matter.*, 2017, **29**, 194001.

2. G. Luo, Y. Jing and Y. Li, *J. Mater. Chem. A.*, 2020, **8**, 15809-15815.
